# Supplementary material for: Peptide-Enabled Nanocomposites Offer Biomimetic Reconstruction of Silver Diamine Fluoride-Treated Dental Tissues
Source: MDPI journal article supplement (doi:10.3390/polym14071368), 2022-03-28
Supplement: s1 [file s1]

# Peptide enabled nanocomposites offer biomimetic reconstruction of silver diamine **fluoride** treated dental tissues

Sarah K. Woolfolk <sup>1,2</sup>, Aya K. Cloyd <sup>1,2</sup>, Qiang Ye <sup>2</sup>, Kyle Boone<sup>2,3</sup>

Paulette Spencer <sup>1,2,3</sup>, Malcolm L. Snead <sup>1,4</sup>, Candan Tamerler <sup>1,2,3\*</sup>

<sup>1</sup> University of Kansas, Bioengineering Program, 1530 W. 15<sup>th</sup> Street, Lawrence, KS 66045-7609, USA

<sup>2</sup> University of Kansas, Institute for Bioengineering Research, 1530 W. 15<sup>th</sup> Street, Lawrence, KS 66045-7609, USA

<sup>3</sup> University of Kansas, Department of Mechanical Engineering, 1530 W. 15<sup>th</sup> Street, Lawrence, KS 66045-7609, USA

<sup>4</sup> Center for Craniofacial Molecular Biology, Herman Ostrow School of Dentistry of USC, The University of Southern California, 2250 Alcazar Street, Los Angeles 90033-9062, USA

## **\* Corresponding author**

Candan Tamerler, PhD

Charles Y. and Mary J. Spahr Professor

Dept. Mechanical Engineering,

Institute for Bioengineering Research

The University of Kansas

1530 W. 15<sup>th</sup> Street, Lawrence, KS 66045-7609

Ph: 785-864-2984

Email: [ctamerler@ku.edu](mailto:ctamerler@ku.edu)

## Supplemental Information:

### Silver-Binding Peptide interacting with Silver Diamine Fluoride

We explored the interaction between silver diamine fluoride (SDF) and silver-binding peptide (AgBP) using attenuated total reflectance Fourier transform infrared spectroscopy (ATR-FTIR). The shifts in the frequency of absorption bands indicate presence of functional groups or changes on the surface chemistry on the sample. We investigated the interaction of SDF and AgBP directly.

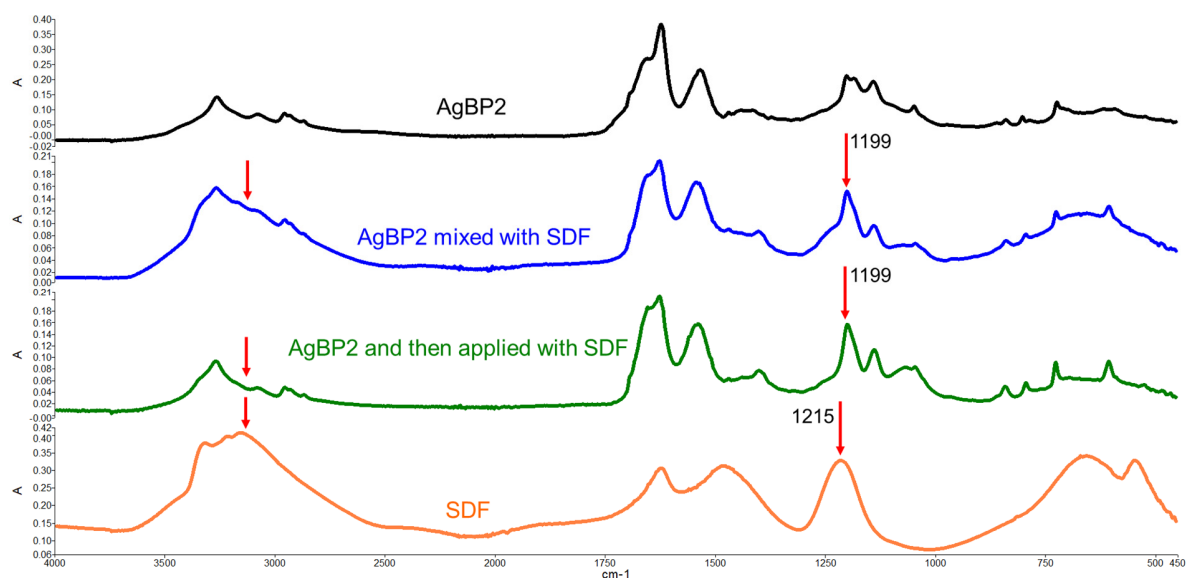

Figure S1. ATR-FTIR spectra of silver binding peptide (AgBP2) with and without interaction of silver diamine fluoride (SDF). With the presence of SDF, the spectra of AgBP2 shows increased intensity of N-H stretching vibration at 3100  $\text{cm}^{-1}$ . The significant peak shifting of N-H bending vibration from 1215  $\text{cm}^{-1}$  to 1199  $\text{cm}^{-1}$  indicated the interaction of AgBP2 and SDF.

Figure S1 provides the interaction of 4 mg/mL SDF and 4 mg/mL AgBP (stoichiometry 13 SDF complexes: 1 peptide). The SDF complex contains ammonia-based compounds, expected FTIR features include: N-H stretching 3600-3300  $\text{cm}^{-1}$ , H-N-H scissoring 1800-1600  $\text{cm}^{-1}$ , and N-H

wagging 1100-1300  $\text{cm}^{-1}$ . We see a substantial peak shift in the N-H bending vibration taking place in the presence of AgBP. This happens both with mixing the two components in solution and with applying AgBP first to the ATR crystal, then SDF. This peak shift demonstrates the interaction of AgBP and SDF.
